# Supplementary material for: Increase of miR-199a-5p by protoporphyrin IX, a photocatalyzer, directly inhibits E2F3, sensitizing mesenchymal tumor cells to anti-cancer agents
Source: PubMed Central journal article supplement (PMC4414163; doi:10.18632/oncotarget.2928), 2015-02-24
Supplement: oncotarget-06-3918-s001.pdf [file oncotarget-06-3918-s001.pdf]

**SUPPLEMENTARY FIGURE**

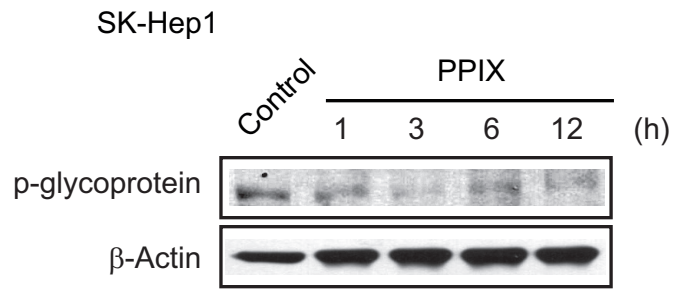

**Supplementary Figure 1: Immunoblotting for p-glycoprotein in SK-Hep1 cells treated with vehicle or 3  $\mu$ M PPIX for 1–12 h.**
